# Supplementary material
Source: PubMed Central journal article supplement (PMC3993936)
Supplement: bm401877s_si_001.pdf [file bm401877s_si_001.pdf]

## Supporting Information

# Electrospinning Bioactive Supramolecular Polymers from Water

Alok S. Tayi,<sup>a</sup> E. Thomas Pashuck,<sup>a</sup> Christina J. Newcomb,<sup>a</sup> Mark T. McClendon,<sup>b</sup> and Samuel I. Stupp<sup>\*a,c,d,e</sup>

## Biological Applications of Electrospun PA Fibers

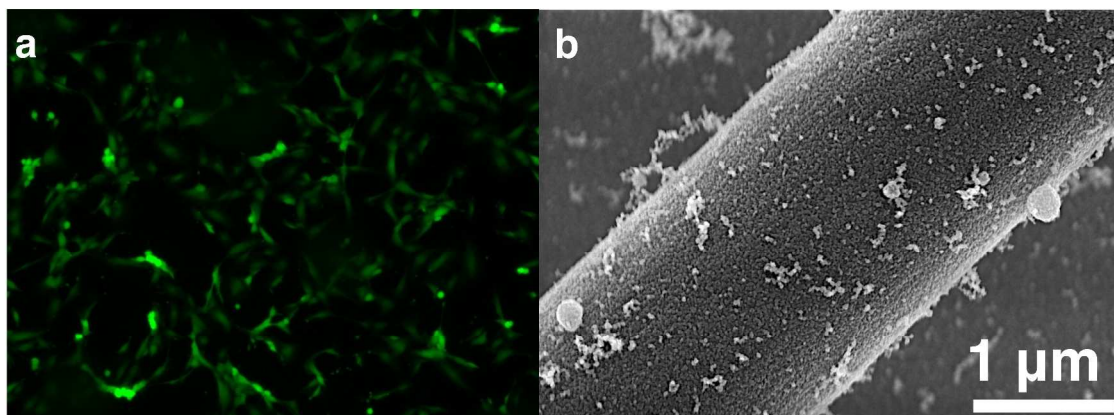

**Figure S1.** a. Live-dead image of Human Vein Endothelial cells (HUVECs) grown on an electrospun PA **1** film deposited on an Indium-Tin-Oxide (ITO) substrate. Green fluorescent cell bodies indicate that the electrospun supramolecular fibers are also biocompatible. b. Mineralized electrospun fiber of PA **2**. Calcium mineral nucleates on the fibers when submerged in calcium-supplemented media for 48 hours.
